# Supplementary material
Source: HighWire-hosted journal article supplement (https://www.annfammed.org/highwire/filestream/13094/field_highwire_adjunct_files/0/HudonSupp_Figure.pdf)
Supplement: HudonSupp_Figure.pdf [file HudonSupp_Figure.pdf]

**Supplemental material for :**

Hudon C, Chouinard M, Aubrey-Bassler K, et al. Case management in primary care for frequent users of health care services: a realist synthesis. *Ann Fam Med.* 2020;18(3):218-226.

Supplemental Figure 1. Initial programme theory.

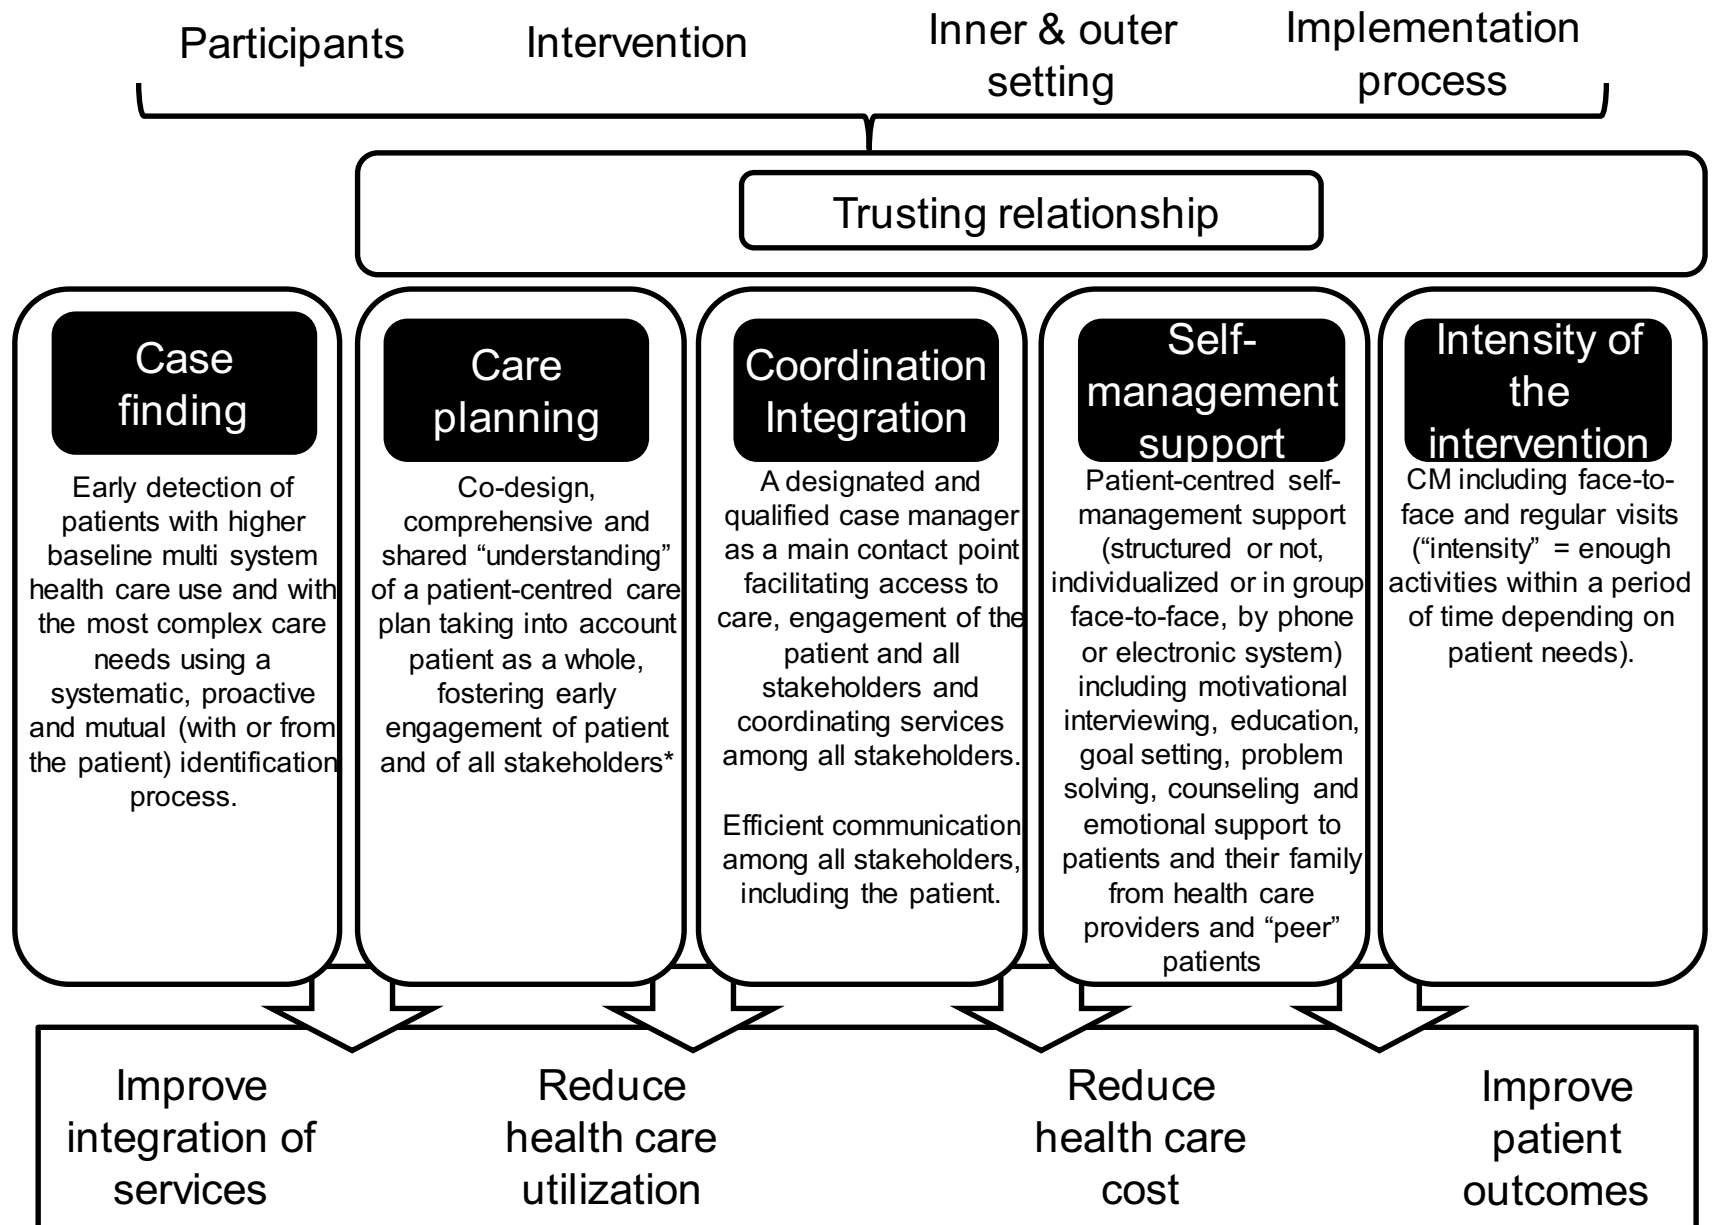

\* Stakeholders include all required health care providers, community resources, patient coach, family, caregivers and patient’s entourage.
